# Supplementary material for: Performance of Affinity-Improved DARPin Targeting HIV Capsid Domain in Interference of Viral Progeny Production
Source: MDPI journal article supplement (doi:10.3390/biom11101437), 2021-09-30
Supplement: s1 [file s1]

## Supplementary Materials

# Performance of Affinity-Improved DARPIn Targeting HIV Capsid Domain in Interference of Viral Progeny Production

Kanokporn Sornsuwan<sup>1,2</sup>, Weeraya Thongkhum<sup>2,3</sup>, Thanathat Pamonsupornwichit<sup>2</sup>, Tanawan Samleerat Carraway<sup>4</sup>, Suthinee Soponpong<sup>2,3</sup>, Supachai Sakkhachornphop<sup>5</sup>, Chatchai Tayapiwatana<sup>1,2,3\*</sup> and Umpa Yasamut<sup>1,2,3\*</sup>

<sup>1</sup>Division of Clinical Immunology, Department of Medical Technology, Faculty of Associated Medical Sciences, Chiang Mai University, Chiang Mai 50200, Thailand; kanokporn\_sornsuwan@cmu.ac.th (K.S.)

<sup>2</sup>Center of Biomolecular Therapy and Diagnostic, Faculty of Associated Medical Sciences, Chiang Mai University, Chiang Mai 50200, Thailand; thanathat.cmu@gmail.com (T.P.)

<sup>3</sup>Center of Innovative Immunodiagnostic Development, Faculty of Associated Medical Sciences, Chiang Mai University, Chiang Mai 50200, Thailand; weeraya.t@cmu.ac.th (W.T.), pear121000@gmail.com (S.S.)

<sup>4</sup>Division of Clinical Microbiology, Department of Medical Technology, Faculty of Associated Medical Sciences, Chiang Mai University, Chiang Mai 50200, Thailand; tsamleerat@gmail.com (T.S.C.)

<sup>5</sup>Research Institute for Health Sciences, Chiang Mai University, Chiang Mai 50200, Thailand; ssakkhachornphop@yahoo.com (S.S.)

\*Correspondence: chatchai.t@cmu.ac.th (C.T.), umpa.yas@cmu.ac.th (U.Y.)

## Supplementary Method

*Single cycle assay in VSV-G pseudotyped NL4-3  $\Delta$ Env virus infected SupT1 cells and ankyrin expressing SupT1 cells*

SupT1 cells and ankyrin-expressing SupT1 cells were infected with 1 MOI of VSV-G pseudotyped NL4-3  $\Delta$ Env virus with an addition of 5  $\mu$ g/ml of polybrene. Infected cells were spinoculated at 2,500  $\times$ g, 32°C for 1.30 h. After 16 hours post-infection, infected SupT1 cells and ankyrin-expressing SupT1 cells were washed three time with RPMI 1640 medium. Cells were resuspended with 10%-HI-FBS-RPMI 1640 medium, and cultured in humidified 5% CO<sub>2</sub> atmosphere incubator at 37 °C. At 48h post-infection, culture supernatants were collected, and centrifuged to remove debris and unwanted particles. Culture supernatant was kept at -80 °C for HIV-1 p24 ELISA. Additionally, cell pellets were harvested for determining intracellular HIV-1 p24.

## Supplementary Figures

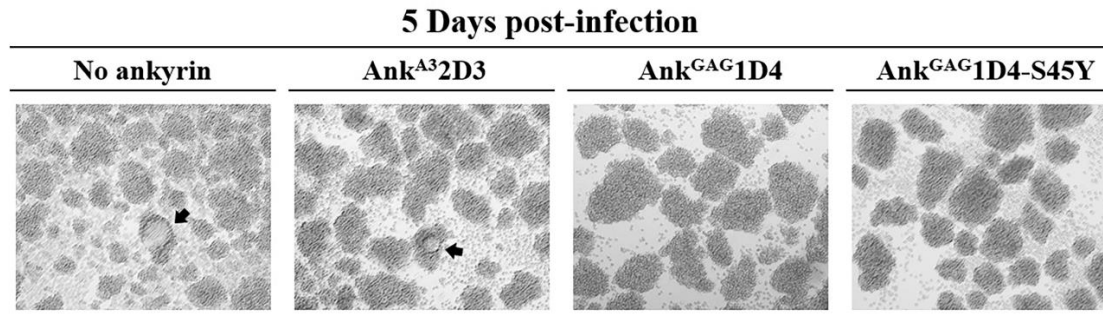

**Figure S1.** Cell morphology of 10 MOI of HIV-1-infected SupT1 cells expressing ankyrins at 5 days post-infection. Cell imaging was done at 20× magnification using Axio Vert.A1. Arrows point to syncytial cells. No ankyrin, Ank<sup>A32D3</sup>, Ank<sup>GAG1D4</sup>, and Ank<sup>GAG1D4-S45Y</sup> represent SupT1 cell control, SupT1 cells expressing Myr (+) Ank<sup>A32D3</sup>-EGFP, Myr (+) Ank<sup>GAG1D4</sup>-EGFP, and Myr (+) Ank<sup>GAG1D4-S45Y</sup>-EGFP, respectively.

**A.**

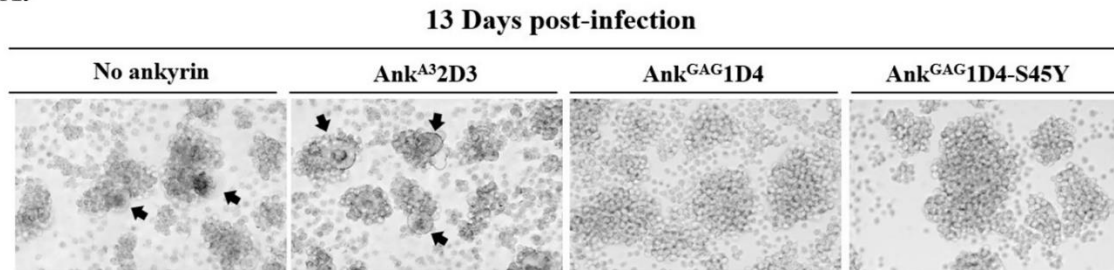

**B.**

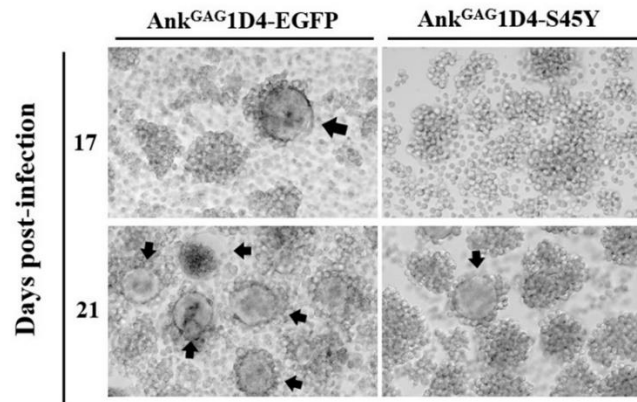

**Figure S2.** Cell morphology of 50 MOI HIV-1 infected ankyrin-expressing SupT1 cells. SupT1 cells and ankyrin-expressing SupT1 cells were infected with HIV-1 NL4-3 laboratory strain at 50 MOI. (A) Cell imaging was done at 20× magnification using Axio Vert.A1. Arrows point to syncytium cells. (B) Syncytium formation in infected SupT1/Myr (+) Ank<sup>GAG1D4</sup>-EGFP and SupT1/Myr (+) Ank<sup>GAG1D4-S45Y</sup>-EGFP was continuously observed until 21 days post-infection. No ankyrin, Ank<sup>A32D3</sup>, Ank<sup>GAG1D4</sup>, and Ank<sup>GAG1D4-S45Y</sup> represent SupT1 cell control, SupT1 cells expressing Myr (+) Ank<sup>A32D3</sup>-EGFP, Myr (+) Ank<sup>GAG1D4</sup>-EGFP, and Myr (+) Ank<sup>GAG1D4-S45Y</sup>-EGFP, respectively.

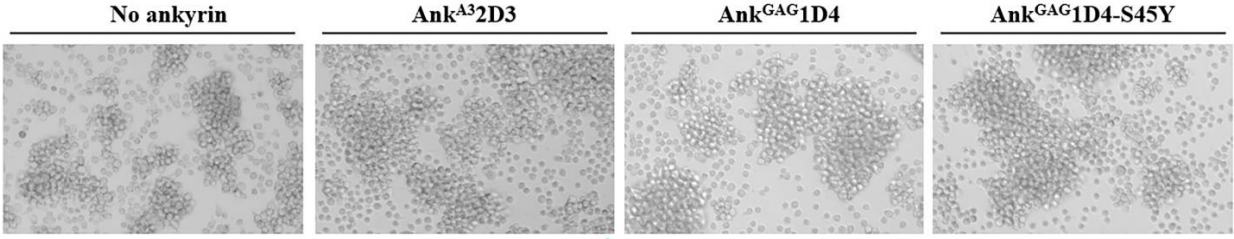

**Figure S3.** Cell morphology of 1 MOI of VSV-G pseudotyped NL4-3  $\Delta$ Env infected SupT1 cells or ankyrin-expressing SupT1 cells. After 48 h post-infection, cell imaging was done at 20 $\times$  magnification using Zeiss Colibri 7. No ankyrin, Ank<sup>A32D3</sup>, Ank<sup>GAG1D4</sup>, and Ank<sup>GAG1D4-S45Y</sup> represent SupT1 cell control, SupT1 cells expressing Myr (+) Ank<sup>A32D3</sup>-EGFP, Myr (+) Ank<sup>GAG1D4</sup>-EGFP, and Myr (+) Ank<sup>GAG1D4-S45Y</sup>-EGFP, respectively.

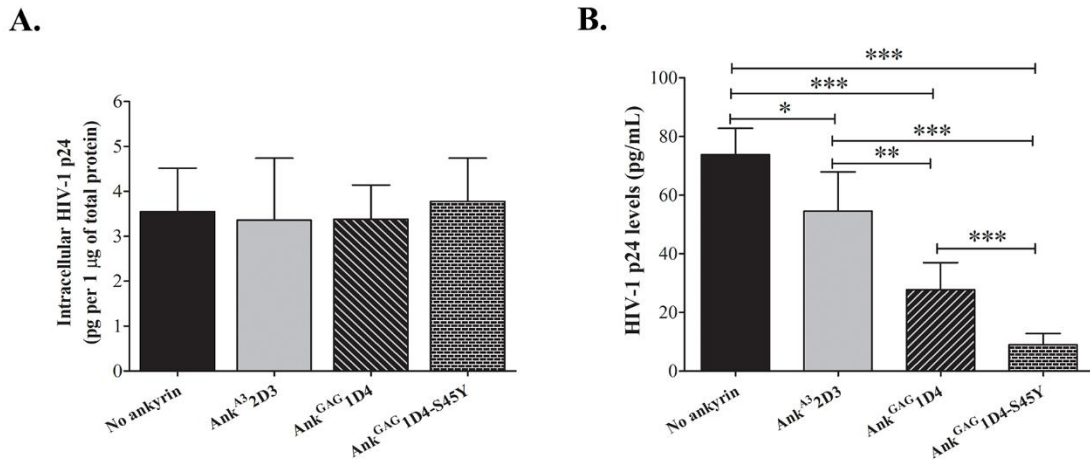

**Figure S4.** Anti-HIV-1 activity of ankyrin proteins in VSV-G pseudotyped NL4-3  $\Delta$ Env infected SupT1 cells and ankyrin-expressing SupT1 cells. At 48h post-infection, cell pellet and culture supernatant were collected for evaluating HIV-1 p24 by ELISA. (A) Cells were lysed for detecting intracellular HIV-1 p24. The amount of HIV-1 p24 in 1  $\mu$ g of total protein was demonstrated. (B) The level of HIV-1 p24 in culture supernatant was determined. Data represent mean  $\pm$  SD from two independent experiment, triplicate wells each. \*  $p \leq 0.05$ , \*\*  $p \leq 0.01$  using unpaired t-test. No ankyrin, Ank<sup>A32D3</sup>, Ank<sup>GAG1D4</sup>, and Ank<sup>GAG1D4-S45Y</sup> represent SupT1 cell control, SupT1 cells expressing Myr (+) Ank<sup>A32D3</sup>-EGFP, Myr (+) Ank<sup>GAG1D4</sup>-EGFP, and Myr (+) Ank<sup>GAG1D4-S45Y</sup>-EGFP, respectively.

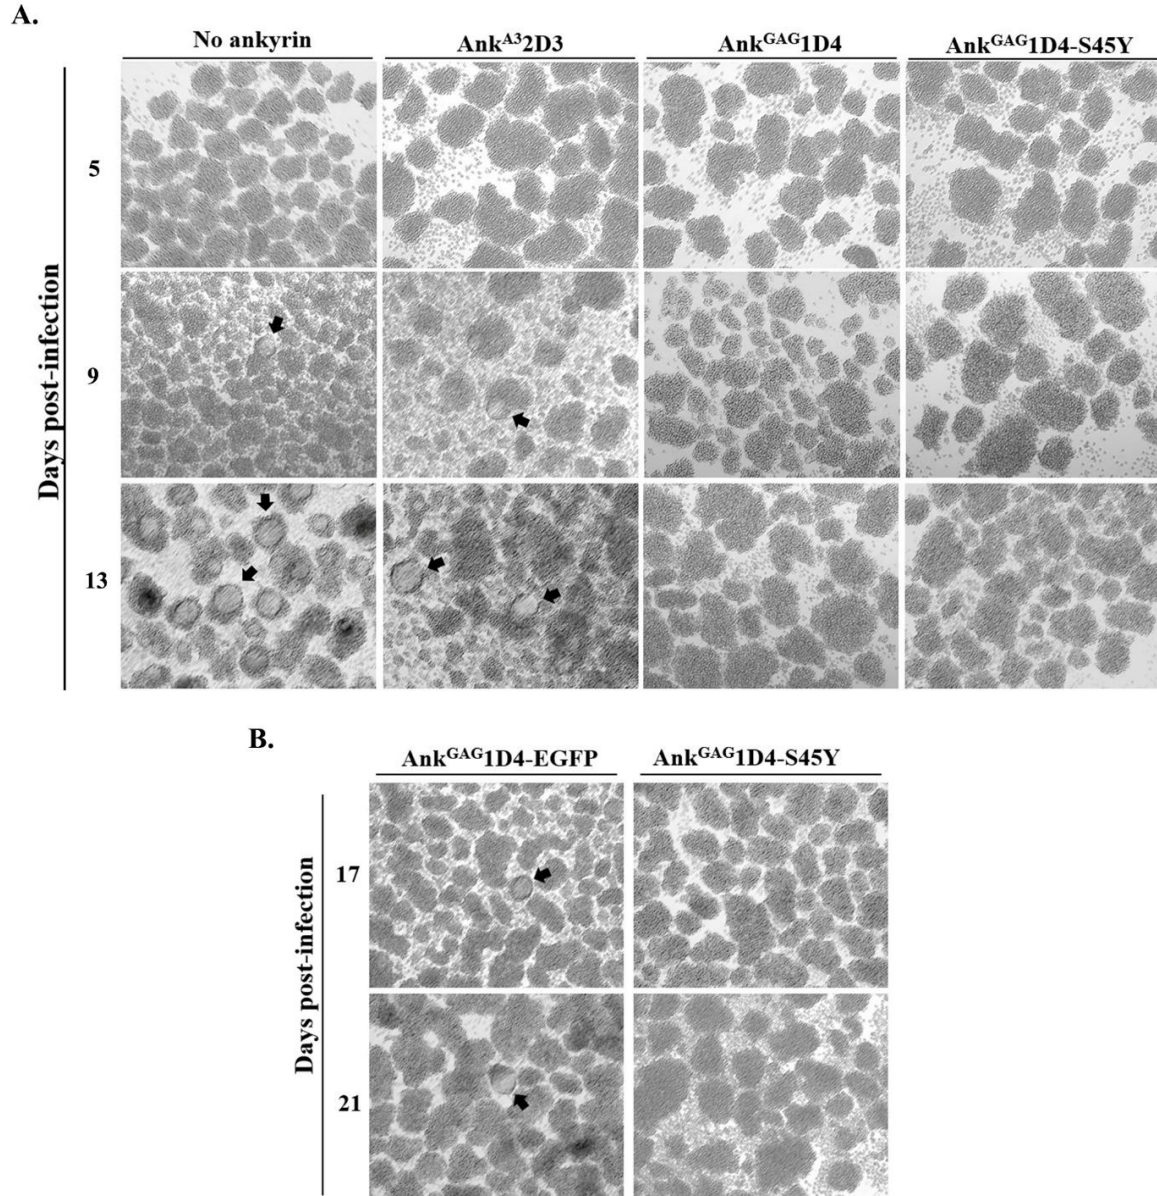

**Figure S5.** Cell morphology of HIV-1 NL4-3 MIR<sub>CAI201V</sub> infected SupT1 cells and ankyrin-expressing SupT1 cells were infected with 10 MOI of HIV-1 MIR<sub>CAI201V</sub> virus. After infection, cells were subcultured every 2 days, and syncytium cells and cell morphology were observed under microscopy. **(A)** Cell imaging was done at 10× magnification using Axio Vert.A1. **(B)** Morphology of infected SupT1/Myr (+) Ank<sup>GAG1D4</sup>-EGFP and SupT1/Myr (+) Ank<sup>GAG1D4-S45Y</sup>-EGFP was continuously observed until 21 days post-infection. Arrows point to syncytium cells. No ankyrin, Ank<sup>A32D3</sup>, Ank<sup>GAG1D4</sup>, and Ank<sup>GAG1D4-S45Y</sup> represent SupT1 cell control, SupT1 cells expressing Myr (+) Ank<sup>A32D3</sup>-EGFP, Myr (+) Ank<sup>GAG1D4</sup>-EGFP, and Myr (+) Ank<sup>GAG1D4-S45Y</sup>-EGFP, respectively.
